1 **Recovery and Community Succession of the *Zostera marina* Rhizobiome After**  
2 **Transplantation**

3

4 **Lu Wang<sup>a</sup>, Mary K. English<sup>a</sup>, Fiona Tomas<sup>b,c</sup>, Ryan S. Mueller<sup>a#</sup>**

5

6 <sup>a</sup>Department of Microbiology, Oregon State University, Corvallis, OR, USA

7 <sup>b</sup>Instituto Mediterráneo de Estudios Avanzados (CSIC-UIB), Balearic Islands, Spain

8 <sup>c</sup>Department of Fisheries and Wildlife, Oregon State University, Corvallis, OR, USA

9

10 **Running Head:** Seagrass Rhizobiome Community Dynamics

11

12 **#Address correspondence to Ryan S. Mueller, [ryan.mueller@oregonstate.edu](mailto:ryan.mueller@oregonstate.edu).**

13

14 **Keywords:** seagrass, eelgrass, restoration, rhizosphere, rhizoplane, sulfur-oxidizing bacteria,  
15 cable bacteria, microbial diversity, succession

16

17

## Seagrass Rhizobiome Community Dynamics

### 18 ***Abstract***

19           Seagrasses can form mutualisms with their microbiomes that facilitate the exchange of  
20 energy sources, nutrients, and hormones, and ultimately impact plant stress resistance. Little is  
21 known about community succession within the belowground seagrass microbiome after  
22 disturbance and its potential role in the plant's recovery after transplantation. We transplanted  
23 *Zostera marina* shoots with and without an intact rhizosphere and cultivated plants for four  
24 weeks while characterizing microbiome recovery and effects on plant traits. Rhizosphere and  
25 root microbiomes were compositionally distinct, likely representing discrete microbial niches.  
26 Furthermore, microbiomes of washed transplants were initially different from those of sod  
27 transplants, and recovered to resemble an undisturbed state within fourteen days. Conspicuously,  
28 changes in microbial communities of washed transplants corresponded with changes in  
29 rhizosphere sediment mass and root biomass, highlighting the strength and responsive nature of  
30 the relationship between plants, their microbiome, and the environment. Potential mutualistic  
31 microbes that were enriched over time include those that function in the cycling and turnover of  
32 sulfur, nitrogen, and plant-derived carbon in the rhizosphere environment. These findings  
33 highlight the importance and resiliency of the seagrass microbiome after disturbance.  
34 Consideration of the microbiome will have meaningful implications on habitat restoration  
35 practices.

36

## Seagrass Rhizobiome Community Dynamics

### 37 ***Importance***

38           Seagrasses are important coastal species that are declining globally, and transplantation  
39 can be used to combat these declines. However, the bacterial communities associated with  
40 seagrass rhizospheres and roots (the microbiome) are often disturbed or removed completely  
41 prior to transplantation. The seagrass microbiome benefits seagrasses through metabolite,  
42 nutrient, and phytohormone exchange, and contributes to the ecosystem services of seagrass  
43 meadows by cycling sulfur, nitrogen, and carbon. This experiment aimed to characterize the  
44 importance and resilience of the seagrass belowground microbiome by transplanting *Zostera*  
45 *marina* with and without intact rhizospheres and tracking microbiome and plant morphological  
46 recovery over four weeks. We found the seagrass microbiome to be resilient to transplantation  
47 disturbance, recovering after fourteen days. Additionally, microbiome recovery was linked with  
48 seagrass morphology, coinciding with increases in rhizosphere sediment mass and root biomass.  
49 Results of this study can be used to include microbiome responses in informing future restoration  
50 work.

51

52 ***Introduction***

53           The rhizobiome has long been recognized to have important impacts on plant growth and  
54 health (1). The microbes of the rhizobiome, which directly interact with and are influenced by  
55 the roots (2), can benefit their plant hosts through recycling and producing bioavailable nutrients  
56 (3–5), increasing disease resistance through competition with or inhibition of pathogens (6), and  
57 influencing plant growth and stress tolerance through production of phytohormones (7, 8).  
58 Community composition within the rhizobiome is shaped by plant metabolism and physiology,  
59 which controls rhizodeposition, exudation of organic carbon and nitrogen, and release of defense  
60 compounds (7, 9, 10). The quantity and composition of exudates can impact microbial activity in  
61 the rhizosphere and vary as a result of many factors (11–14). While plant-rhizobiome  
62 interactions are relatively well-defined for terrestrial plants, analogous interactions between  
63 aquatic plants and their microbiomes have only recently started to become known (15, 16).

64           Seagrasses are marine vascular plants that form key ecosystems on coastal areas  
65 worldwide, where they provide numerous ecosystem services (17). Recent evidence suggests that  
66 members of the seagrass microbiome may modulate host growth and response to environmental  
67 stresses (15, 18, 19). In addition to fixing nitrogen and producing phytohormones (20, 21), the  
68 seagrass microbiome is proposed to mitigate the toxic effects of hydrogen sulfide in sediments,  
69 which have been linked to declines in seagrass health and localized die-back events (22–24). The  
70 seagrass rhizobiome is thought to be primarily influenced by exudation of carbon compounds,  
71 which can provide up to 60% of the carbon assimilated by these microbes (25, 26), and by radial  
72 oxygen loss from roots, which may promote colonization of the rhizosphere by distinct bacteria  
73 (24, 27).

## Seagrass Rhizobiome Community Dynamics

74           The effect of rhizosphere disturbance on the composition of seagrass microbiomes and  
75 plant health has rarely been explored (28). Yet, it may be important both for plant recovery after  
76 a disturbance and in the context of restoration outcomes, which are highly variable and  
77 dependent on methodology (29–32). Sod transplants, which transfer shoots with intact  
78 rhizospheres, have historically been one of the more successful methods, potentially because the  
79 intact rhizosphere sediment acts as a natural anchor and retains functional relationships between  
80 the plant and its rhizobiome (31). Conversely, bare root transplants are generally less successful  
81 and could experience a decrease or lag in plant performance as the rhizobiome redevelops after  
82 transplantation. Importantly, microbial community succession after disturbance can strongly  
83 affect host health in several microbiome-host systems (e.g., algae, corals, and humans), whereby  
84 dysbiosis disrupts host functioning and increases susceptibility to disease (33–35). Thus, it is  
85 important to understand the recovery of seagrass microbiomes after disturbance, as this may  
86 impact seagrass health and resistance to environmental stresses.

87           In this study, we characterized the recovery of seagrass rhizobiomes post-disturbance by  
88 transplanting *Zostera marina* with and without an intact rhizosphere and sampling for plant and  
89 microbiome characteristics over the course of 28 days. We expected to see the rhizobiome of  
90 seagrass transplanted without an intact rhizosphere recover over time to resemble that of the  
91 control plants, with a corresponding delay in the response of plant growth traits.

## 92 **Results**

### 93 *Changes in Z. marina Traits After Transplantation*

94           We quantified several traits to assess plant growth and measure the rhizosphere sediment  
95 mass recovery on roots after transplantation (Table S2). Plant traits varied significantly due to an  
96 interaction between days post transplantation (DPT) and treatment (PERMANOVA: DPT x

## Seagrass Rhizobiome Community Dynamics

97 Treatment  $F_{1,61} = 2.85$ ,  $p = .036$ ,  $R^2 = .03$ ; Table S3). While plant traits did not differ amongst  
98 treatments at the beginning of the experiment (PERMANOVA: Day 0 Treatment  $F_{1,8} = 1.12$ ,  $p =$   
99  $.304$ ,  $R^2 = .12$ ; Figures 1B and S1), they exhibited overall differences within seven days after  
100 transplantation, and plant traits of the wash treatment began to more strongly resemble those of  
101 the sod treatment after one week (Figure 1A). For sod transplants, the most variation in traits  
102 occurred within the first seven days of the experiment, after which these measures stabilized and  
103 remained relatively constant (Figures 1B and S1). Conversely, changes in the traits of washed  
104 plants occurred more slowly, stabilizing only after fourteen days. By the end of the experiment  
105 no between-treatment variation in traits was evident (PERMANOVA: Day 28 Treatment  $F_{1,13} =$   
106  $1.00$ ,  $p = .422$ ,  $R^2 = .07$ ; Figures 1B and S1).

107 Most traits exhibited significant increases over the course of the experiment in both the  
108 wash and the sod treatment groups, indicating overall growth of *Z. marina* shoots after  
109 transplantation regardless of rhizosphere presence (Figure S1 & Tables S4-S8). For instance,  
110 upon experiment completion, total biomass of transplants had increased 1.5-fold on average, and  
111 lengths of leaves and rhizomes had increased 1.5 and 1.8-fold, respectively (Figure S1). Whereas  
112 differences in traits due to treatment were minimal at the beginning and end of the experiment,  
113 they were most pronounced from days one to fourteen of the experiment when sod transplants  
114 consistently demonstrated greater increases compared to those of the washed transplants (Figure  
115 1C). For example, root biomass and root length were not significantly affected by rhizosphere  
116 removal at the beginning of the experiment (Student's t-test [root biomass]: Wash  $M = 0.016 \pm$   
117  $0.012$  g, Sod  $M = 0.012 \pm 0.006$  g,  $t(8) = -0.57$ ,  $p = .58$ ; Student's t-test [root length]: Wash  $M =$   
118  $6.04 \pm 1.91$  cm, Sod  $M = 4.46 \pm 0.92$  cm,  $t(8) = -1.67$ ,  $p = .13$ ). Importantly, though, sod  
119 transplants increased 1.7-fold in root biomass on average, whereas wash transplants increased

## Seagrass Rhizobiome Community Dynamics

120 1.1-fold by the end of the experiment (ANCOVA: Treatment  $F_{1,72} = 16.16, p = .0001$ ; Figures  
121 1C & S1C, Table S7). As expected from our treatment, rhizosphere sediment mass significantly  
122 varied with the interaction between the time covariate and the main treatment effect (ANCOVA:  
123 DPT x Treatment  $F_{1,71} = 18.78, p < .00005$ ; Figure S1D & Table S8). The rhizosphere mass  
124 attached to roots of sod transplants did not change significantly during the experiment, whereas  
125 sediment accumulation on washed roots rapidly increased after seven days post transplantation  
126 and recovered to levels observed on sod transplants by the end of the experiment (Welch's t-test:  
127 Wash M =  $16.34 \pm 10.03$  g, Sod M =  $25.25 \pm 13.26$  g,  $t(13) = 1.48, p = .16$ , Figure S1D).

### 128 *Microbial Community Differences Between Z. marina Rhizosphere and Roots*

129 When considering all samples, microbial communities were most strongly clustered  
130 based on compartment (PERMANOVA: Compartment  $F_{1,112} = 26.33, p = .001, R^2 = .16$ ; Figure  
131 2A and Table S9). Forty-two prokaryotic ASVs exhibited significantly different relative  
132 abundances in the rhizosphere versus roots (Table S10). Twenty-five were enriched in the  
133 rhizosphere, while the remaining 17 were in greater relative abundance on roots (Figure 2B).  
134 Significant ASVs were most commonly assigned to the Proteobacteria and Bacteroidetes phyla  
135 ( $n = 18$  and  $12$ , respectively), with 66% of the former taxon and 75% of the latter detected in  
136 higher relative abundance in rhizosphere over root communities. Conversely, ASVs of the  
137 Epsilonbacteraeota phylum were typically in higher relative abundances in root samples (five of  
138 seven ASVs). Due to the strong effect of compartment on microbial community structure, the  
139 remaining microbial diversity results are presented separately for rhizosphere and root samples.

### 140 *Changes in Rhizosphere Microbiomes After Transplantation*

141 Temporal changes in the structure of rhizosphere microbial communities mirror the  
142 patterns observed for plant trait data. That is, initial differences were observed between

## Seagrass Rhizobiome Community Dynamics

143 rhizosphere communities from plants of different treatment groups, but communities became  
144 more similar in structure by the end of the experiment (Figure 3A). The most variation was due  
145 to a shift of rhizosphere communities of washed transplants along the first principle coordinate to  
146 more strongly resemble sod samples after seven days. As observed for plant traits, a significant  
147 interactive effect of treatment and time on the rhizosphere community structure was detected  
148 (PERMANOVA: DPT x Treatment  $F_{1,58} = 2.53, p = .005, R^2 = .03$ ; Table S11).

149 To further investigate the treatment effect of rhizosphere disruption on the recovery of  
150 the rhizosphere communities, we analyzed the different treatment samples separately. Structural  
151 changes in the rhizosphere communities of the sod and wash treatment groups both demonstrated  
152 significant time effects, but a stronger temporal correlation was detected for the washed than sod  
153 transplant rhizosphere communities (PERMANOVA: DPT [Wash transplants]  $F_{1,25} = 6.47, p =$   
154  $.001, R^2 = .21$ ; DPT [Sod transplants]  $F_{1,33} = 3.57, p = .001, R^2 = .10$ ; Tables S12 & S13). A shift  
155 in community structure of washed transplants occurred at seven days and corresponded to the  
156 point of accelerating sediment accumulation on washed roots. Additionally, overall community  
157 changes were significantly correlated to rhizosphere sediment masses of all washed plants  
158 (Mantel test  $p = .004$ , Spearman's  $\rho = .25$ ; Figure 3B). For sod transplants, however, sediment  
159 mass was not correlated with rhizosphere community structure (Mantel test  $p = .43$ , Spearman's  
160  $\rho = .0001$ ; Figure 3C), and was instead most strongly correlated with plant growth traits (Mantel  
161 test: Leaf Length + Rhizome Length + Leaf Biomass  $p = .001$ , Spearman's  $\rho = .27$ ).

162 We used regression analyses to identify microbial taxa that were specifically associated  
163 with *Z. marina* rhizosphere development during the experiment (GLMM: *adjusted p*  $\leq .05$ ; Table  
164 S14). Thirty-two taxonomic families had significantly different modeled intercepts between  
165 treatments, and 14 taxa exhibited significant differences in modeled slopes. Six taxa were found



## Seagrass Rhizobiome Community Dynamics

166 with significant differences in both slopes and intercepts (Figure 3D). Of these six, the  
167 Ruminococcaceae and Sulfurovaceae had negative intercepts and positive slope coefficients. For  
168 example, higher relative abundances of the Ruminococcaceae were detected in the sod samples  
169 on average, but the rate of increase of this taxon's abundance was greater in washed samples  
170 over time. The Sulfurovaceae showed a similar temporal pattern of abundance in washed  
171 samples, but in sod transplants this taxon generally demonstrated a decrease over time. The  
172 remaining four taxa (Clostridiales Family XII, Sandaracinaceae, Chromatiaceae, and Rhizobiales  
173 [Incertae sedis]) all showed similar patterns (Figure 3D); in washed transplants they rapidly  
174 decreased to low levels within the first seven days of the experiment, whereas in sod transplants  
175 there was little to no detection of them throughout the experiment.

### 176 *Changes in Root Microbiomes After Transplantation*

177 Recovery dynamics of root microbiomes were largely similar to those observed for  
178 rhizosphere communities (Figure 4A). A significant effect of the interaction between time and  
179 treatment on the structure of all root communities was detected (PERMANOVA: DPT x  
180 Treatment  $F_{1,58} = 2.01$ ,  $p = .043$ ,  $R^2 = .03$ ; Table S15). A relatively strong effect of time was  
181 evident for communities from wash transplants (PERMANOVA:  $F_{1,26} = 5.91$ ,  $p = .001$ ,  $R^2 = .19$ ;  
182 Figure 4B & Table S16), but not for sod transplants (PERMANOVA:  $F_{1,28} = 1.78$ ,  $p = .096$ ,  $R^2 =$   
183  $.06$ ; Figure 4C & Table S17). Changes in washed root microbiome community structure were not  
184 correlated with sediment mass accumulation (Mantel test:  $p = .085$ , Spearman's  $\rho = .13$ ), and  
185 were instead most strongly correlated with leaf length and rhizome mass (Mantel test:  $p = .001$ ,  
186 Spearman's  $\rho = .32$ ). In contrast, the root microbiomes of sod transplants were relatively stable  
187 over time (PERMANOVA:  $F_{1,28} = 1.78$ ,  $p = .096$ ,  $R^2 = .06$ ; Figure 4C & Table S17), and not  
188 correlated with any single plant trait or combination thereof.

## Seagrass Rhizobiome Community Dynamics

189           Regression analyses identified 25 taxa with significant differences in modeled intercepts  
190 between treatments, but no differences in modeled slopes (Table S18). Another four taxa were  
191 found to have no detectable differences in intercepts, but significant differences in slopes. Six  
192 taxa were found to have significant differences in both modeled intercepts and slopes (Figure  
193 4D). The Lentimicrobiaceae, Ruminococcaceae, Desulfobacteraceae, and an unknown  
194 Gammaproteobacteria family were all modeled to have largely similar dynamics, with negative  
195 intercepts and positive slope coefficients. Abundances of these taxa on roots of sod transplants  
196 rapidly declined within seven days of transplantation, followed by a more gradual increase in  
197 abundance over the last two weeks of the experiment (Figure 4D). Conversely, these taxa were  
198 nearly undetectable initially on roots of washed transplants, but their abundances recovered by  
199 experiment completion. The Sulfurovaceae also exhibited gradual increases in relative  
200 abundance on washed roots, but in sod transplants this taxon's abundance increased after seven  
201 days and subsequently decreased (Figure 4D). Vibrionaceae showed an altogether different  
202 pattern; high abundances were detected in initial wash samples, but by day seven these taxa were  
203 rarely detected. In sod transplants, this group was generally absent throughout the entire  
204 experiment.

### 205 ***Discussion***

206           Our results indicate that *Zostera marina* rhizobiome communities are distinct, linked to  
207 seagrass performance, and resilient to disturbance. Indeed, eelgrass belowground traits suffered  
208 negatively from undergoing rhizosphere removal, but they recovered after ca. 2 weeks.  
209 Concomitantly, their microbial communities resembled those of sod transplants by experiment  
210 end, indicating that *Z. marina* and its belowground microbiome are resilient to stresses  
211 associated with transplantation.

## Seagrass Rhizobiome Community Dynamics

212           The observation of consistently distinct microbial communities between compartments of  
213 *Z. marina* is in line with studies describing the structure of seagrass microbiomes from field-  
214 collected samples, where large differences are observed between plant microbial communities  
215 and those in the surrounding environment (15, 18, 19, 36–39). In the study by Cúcio et al. (15)  
216 where the rhizosphere compartment was specifically analyzed, significant differences were  
217 found between communities of bulk and rhizosphere sediments. Our work further distinguishes  
218 the root-attached microbiome as different from the microbiota of the rhizosphere, and suggests  
219 that these two compartments are separate microbial niches shaped by prevailing redox and  
220 nutrient gradients formed across sub-millimeter ranges by plant metabolic processes (40). These  
221 results are supported by previous observations (19, Wang et al., submitted for publication) and a  
222 proposed model of microbiome assembly via selection of bulk sediment microbes (19).

223           Although the mechanisms controlling assembly of seagrass microbiomes are largely  
224 unknown, evidence from terrestrial plant studies suggest that they are based on metabolic  
225 interactions and nutrient exchange between plants and microbes. For instance, changes in abiotic  
226 factors and/or the presence of pathogens can induce or restrict exudation of nutritional and  
227 allelopathic compounds, contributing to the selection of a root microbiome (9, 41). Root  
228 exudation is known to be metabolically costly for plants, though, and can result in significant  
229 losses of carbon and nitrogen (7). However, these costs are likely offset by the beneficial  
230 functions of the belowground microbiome (e.g., disease suppression, nutrient acquisition, stress  
231 tolerance, and growth enhancement) (7, 8, 42).

232           Similar to these terrestrial plant examples, we propose that exudation is an important  
233 factor modulating belowground microbiomes of seagrasses. Seagrass exudation is known to  
234 change with environmental conditions (e.g. light restriction) (43), and can act as an important

## Seagrass Rhizobiome Community Dynamics

235 resource for sediment microbes (26, 44). Our concomitant observations of belowground biomass  
236 loss in washed *Z. marina* plants and large-scale changes in the microbiome structure within the  
237 first week after transplantation may be related to changes in root exudation, and would suggest a  
238 rapid and coordinated response by both the microbiome and plant to disturbance. While we  
239 cannot rule out the effects of potential root damage that may have occurred during seawater  
240 rinses to remove the rhizosphere prior to transplantation on microbiome community structure,  
241 our data suggest that no observable and significant root breakage and/or biomass loss occurred  
242 from initial washes.

243         When considering the timing of recovery between belowground compartments, it is  
244 notable that the change in microbial community structure of washed roots was detected three  
245 days after transplantation, whereas a similar change in the rhizosphere was detected on day seven  
246 (Figures 3B & 4B). This supports a possible role of root exudates in attracting or repelling  
247 microbial populations based on their proximity to the root surface. Interestingly, almost all of the  
248 root- and rhizosphere-associated taxa that significantly changed in abundance over time  
249 demonstrated an inflection point in their abundance trajectories between three and seven days  
250 post transplantation (Figures 3D & 4D). When considered with the changes observed for plant  
251 traits, these data suggest that the first week after transplantation is a critical transition period for  
252 the plant and its associated microbiome.

253         Rapid and resilient responses of microbiomes to disturbance have also been observed for  
254 microbiomes of terrestrial plants (45) and marine algae (34). In the latter study, community  
255 assembly on the surface of *Delisia pulchra* was found to be deterministic, recovering to a pre-  
256 disturbed state within 12 days. In this system, the production of anti-fouling chemicals (i.e.,  
257 halogenated furanones) either by early-colonizing bacteria or by the algae, is an important factor

## Seagrass Rhizobiome Community Dynamics

258 controlling community succession. Seagrasses can also produce a diverse set of anti-fouling  
259 chemicals on their surfaces (46). Their precise role in modulating the epibiont community  
260 structure is currently unknown, but we believe that the collective results of ours and the  
261 aforementioned studies suggest that these compounds and nutritional exudates act to  
262 deterministically shape microbiome community structure.

263 Further, our results show that several taxa that may benefit the plant directly or enhance  
264 turnover of nutrients in sediments are enriched in seagrass-associated compartments after  
265 transplantation. ASVs assigned to the Bacteroidetes and the Sandaracinaceae taxa were always  
266 found to be significantly higher in relative abundance in rhizosphere over root samples. Both  
267 taxa are common inhabitants of marine environments and widely recognized to be important  
268 degraders of complex organic material, such as rhizodeposits, from plants (47–50). Notable taxa  
269 that were enriched on roots include ASVs with potential important roles in turnover of plant  
270 exudates. Namely, the Methylophagaceae are methanol consumers that can significantly impact  
271 plant growth and stress tolerance through the production of plant hormones (51, 52).

272 Additionally, ASVs of the Lachnospiraceae and Colwelliaceae families that were enriched on  
273 roots may have potential roles in consumption of plant-derived polysaccharides and lignin (53,  
274 54). In fact, the former group may have an additional symbiotic role with plants, as a novel  
275 species of Lachnospiraceae is proposed to be diazotrophic (55).

276 Other taxa found enriched in either the root or rhizosphere compartment appear to rely on  
277 respiratory metabolisms linked to sulfur and nitrogen cycles, a common feature of populations of  
278 the seagrass microbiome (20, 56). For example, lineages of the Desulfobulbaceae, which were  
279 more commonly enriched in the rhizosphere compartment, can act as strictly anaerobic sulfate  
280 reducers (e.g., *Desulforhopalus sp.*) (57), or as sulfide oxidizers whose filamentous cells respire

## Seagrass Rhizobiome Community Dynamics

281 by transferring electrons from reduced sulfur compounds across redox gradients to either oxygen  
282 or nitrate (e.g., the so-called ‘cable bacteria’ of *Ca. Electrothrix sp.*) (58, 59). When associated  
283 with *Z. marina*, Desulfobulbaceae cells may thrive in or around the oxic/anoxic transition zone  
284 within the rhizosphere where they transfer electrons to and from reduced sulfur compounds  
285 found within sediments. Such a preference is supported by recent work showing increased  
286 detection of these cells in low oxygen zones of seagrass roots (24) and the oxic-anoxic transition  
287 zone around roots of other aquatic plants (60). Several ASVs found enriched on roots were  
288 designated as known or putative sulfur-oxidizing bacteria (SOB), including Sedimenticolaceae  
289 (61), Thiiovulaceae, and Arcobacteraceae (62), supporting the hypothesis that seagrasses  
290 facilitate the activities of SOB as a way to combat sulfide toxicity (63).

291         The Ruminococcaceae and the Sulfurovaceae stand out in our time-course analyses, as  
292 both exhibited similar abundance differences initially and over time in both root and rhizosphere  
293 samples. ASVs of these taxa, along with those of the Lentimicrobiaceae, Desulfobacteraceae,  
294 and Unknown Gammaproteobacteria, were noticeably absent on washed roots at the start of the  
295 experiment, but all recovered to the relatively high levels found on roots of sod transplants by the  
296 end of the experiment. Many of these taxa are known to drive sulfur cycling in marine sediments  
297 (62, 64, 65) and their functional roles may be important in long-term associations with plants. In  
298 contrast, the Vibrionaceae were the only taxa that rapidly decreased from high relative  
299 abundances on washed roots to undetectable levels after seven days. Given that many *Vibrio*  
300 species are pathogens that rapidly form biofilms on marine surfaces (66, 67) it is possible that  
301 these ASVs are detrimental to root health, and plants respond by changing chemical exudation as  
302 a way to discourage growth of these of bacteria while encouraging growth of beneficial microbes

## Seagrass Rhizobiome Community Dynamics

303 shortly after disturbance, when plants are vulnerable to transplantation stresses (i.e.,  
304 transplantation shock).

305 Seagrass health after transplantation is often unpredictable (30) and restoration success is  
306 thought to be dependent on many factors, with root growth and sediment anchoring identified as  
307 keys to long-term success (31, 68, 69). Despite the importance of these belowground processes,  
308 few studies have explicitly examined the impact of microbiome community structure on  
309 transplantation success. A study by Milbrandt and colleagues is, perhaps, an instructive  
310 exception (28). Similar to our findings, washed and sod transplants of *Thalassia testudinum*  
311 showed few differences in plant traits several weeks after transplantation. Critically, though,  
312 transplants that were planted into autoclaved sediment demonstrated a strong and significant die-  
313 off starting at seven weeks post transplantation, leading the authors to conclude that an intact  
314 microbial community is essential to the plant's ability to combat transplantation shock. An  
315 important distinction of our work is that growth traits of washed transplants consistently lagged  
316 behind those of sod transplants during the first week of the experiment when microbiome  
317 recovery was most pronounced. Given these results and the highly variable nature of restoration  
318 outcomes, understanding the roles of the seagrass microbiome in optimizing plant physiology,  
319 combating transplantation shock, and contributing to anchoring effects at the bed-scale will be  
320 essential to the development of best practices for future seagrass restoration programs.

### 321 ***Materials and Methods***

#### 322 *Experimental Setup*

323 Sediment (top ~ 15 cm) and 90 healthy *Z. marina* primary shoots were manually  
324 collected at low tide from intertidal eelgrass beds in Yaquina Bay, OR, USA (44.624518, -  
325 124.044372) during July 2018. Sediment was sieved (4 cm<sup>2</sup>) and held in buckets filled with

## Seagrass Rhizobiome Community Dynamics

326 seawater for 24 h. Plants were manually extracted from the beds by excavating a ~3 cm radius  
327 sediment ball around the roots and collecting terminal shoots with attached rhizome fragments, a  
328 method that is similar to those previously used in studies on seagrass transplantation (70–72).  
329 The loosely attached, non-rhizosphere sediment was dislodged from the rhizome fragment by  
330 gentle agitation. This procedure adheres to the operational definition of the rhizosphere -- the  
331 sediment attached to the roots after manually shaking (15, 73) -- while also capturing the  
332 biological definition of the rhizobiome, i.e., the microbial community that is closely associated  
333 with plant roots and is influenced by plant metabolism (1). Plants were placed in plastic bags and  
334 processed for transplantation within three hours of collection.

335 Individual plants were randomly assigned to either the "wash" or "sod" transplant  
336 treatment group. The rhizospheres of plants in the washed group were removed by a gentle  
337 seawater rinse, replicating the potential rhizosphere loss in transplantation efforts. The  
338 rhizospheres of plants assigned to the sod treatment group were left undisturbed. The rhizomes  
339 of plants in the wash treatment were trimmed to retain five internodes connected to the first five  
340 root bundles (74), and rhizomes of sod transplants were standardized by trimming to lengths  
341 matching those of washed plants. Plant leaves were standardized across treatments by trimming  
342 to 50 cm (75).

343 PVC cylinders (18 x 7.6 cm) were filled with sediment and the meristem of each plant  
344 was positioned near the top of each. Sediment was added to cover the rhizome, roots, and  
345 rhizosphere (if attached). Planters were randomly and evenly placed inside a 2000 liter outdoor  
346 flow-through tank filled with water from Yaquina Bay.

347 *Plant Sampling and Morphometric Analyses*



## Seagrass Rhizobiome Community Dynamics

348 Whole plant sampling was performed on the initial day of the experiment ( $t = 0$ ) prior to  
349 transplantation and on days 1, 3, 7, 14, 21, and 28 post-transplantation. At least five plants from  
350 each treatment were collected and destructively sampled at each time point. Plants were initially  
351 agitated to remove loosely attached sediment. The rhizosphere sediment was then washed from  
352 plant roots in 25 ml of sterile seawater and collected in sterile tubes. One ml of the resulting  
353 slurry was transferred to a sterile microcentrifuge tube and stored at  $-80\text{ }^{\circ}\text{C}$  until DNA extraction.  
354 One pair of the youngest root cluster was then removed from the plant, transferred to a sterile  
355 microcentrifuge tube, and stored at  $-80\text{ }^{\circ}\text{C}$  for DNA extraction.

356 Roots not used for extractions were removed from plants, counted, and measured to  
357 calculate average lengths. Rhizome lengths and longest leaf lengths were recorded for plants.  
358 Biomass measurements were recorded for the component parts of plants (i.e., leaves, rhizomes,  
359 and roots) after drying for seven days at  $40\text{ }^{\circ}\text{C}$ . The residual sediment slurries from plants ( $\sim 24$   
360 ml/plant) were vacuum-filtered through pre-weighed GFF membranes, dried as above, and net  
361 weights were recorded as rhizosphere masses.

### 362 *DNA extraction, PCR, and Amplicon Sequencing*

363 Microbial community DNA was extracted from frozen roots and sediment slurries using a  
364 CTAB and phenol:chloroform extraction method (76) within six weeks of sample collection.  
365 Amplicon sequencing libraries were constructed from 25-100 ng of template DNA using a one-  
366 step PCR with bar-coded 515F and 806R universal 16S rRNA (v3-v4) primers (77). PCRs were  
367 performed using AccuStart II ToughMix Polymerase following the manufacturer's instructions  
368 and performing a thermal cycle program of:  $94\text{ }^{\circ}\text{C}$  (3 min.); 25 cycles of  $94\text{ }^{\circ}\text{C}$  (45 sec.),  $50\text{ }^{\circ}\text{C}$   
369 ( $60\text{ sec.}$ ),  $72\text{ }^{\circ}\text{C}$  (90 sec.);  $72\text{ }^{\circ}\text{C}$  (10 min.);  $4\text{ }^{\circ}\text{C}$  (hold).

## Seagrass Rhizobiome Community Dynamics

370 Successful amplification reactions (139 of 143 samples) were purified using Agencourt  
371 AMPure XP beads following the manufacturer's instructions, with the exception that a 1:1 ratio  
372 of bead solution and PCR product was used. A Qubit 2.0 fluorometer (Thermo Fisher Scientific,  
373 Waltham, MA, USA) was used to quantify concentrations of purified amplicons, and these  
374 values were used to evenly pool libraries prior to sequencing with the Illumina MiSeq (Illumina  
375 Inc., San Diego, CA, USA).

376 The 'DADA2' package (v 1.10.1) (78) within the Bioconductor software environment (v  
377 3.8) (79) of the R Project (v 3.5.2) (80) was used to process raw sequencing reads. All reads were  
378 initially quality filtered using the 'filterAndTrim' command with default settings ("maxN=0,  
379 maxEE=c(2,2), truncQ=2"). To avoid computational limitations resulting from the fact that  
380 multiple libraries contained  $\gg 100000$  reads, the resulting high-quality reads of libraries were  
381 randomly down-sampled to 15000 paired-end reads (BioProject ID: PRJNA591021). This  
382 resulted in 126 libraries with  $\geq 8891$  high-quality paired-end reads used as inputs for the  
383 remaining DADA2 pipeline (i.e., error-rate training, sample inference, paired-read merging,  
384 chimera removal, ASV (Amplicon Sequence Variant) counting, and taxonomic assignment  
385 against the SILVA Ref NR 132 database) (81). An average of  $7819 \pm 1430$  sequences were  
386 retained across all libraries (Table S1), and sequence counts were rarefied to the library with the  
387 minimum count ( $n = 4881$ ) using the 'rarefy' function of 'vegan' (v 2.5-5) (82). A final count  
388 table with individual samples containing  $119 \pm 27$  ASVs and 2296 ASVs detected across all  
389 samples was generated.

390 A filtered alignment of representative ASV sequences against the pre-computed SILVA  
391 Ref NR 132 alignment was created using the 'align.seqs' and 'filter.seqs' commands of the mothur  
392 software package (v 1.40.5) (83). FastTreeMP (v 2.1.7) (84) calculated a phylogenetic tree from

## Seagrass Rhizobiome Community Dynamics

393 the filtered alignment applying a generalized time-reversible model of evolution (85). The  
394 resulting tree was midpoint rooted using ‘reroot.pl’ (86).

### 395 *Statistical Analyses*

396 The ‘phyloseq’ package (v 1.26.1) (87) was used to import the phylogenetic tree, count  
397 table, taxonomy table, sequence FASTA of ASVs, and a matrix containing plant trait data,  
398 sampling date, plant compartment information, and treatment assignments for each sequence  
399 library into R. Single pseudocounts were added to plant trait variables containing zeros, allowing  
400 for log<sub>2</sub>-transformation. All statistical testing was performed in R and plots were created using  
401 ‘ggplot2’ (v 3.1.1) (88) and ‘ggpubr’ (v 0.2.1) (89). Summary statistics are reported as means  
402 (M) plus/minus standard deviation, unless otherwise stated.

403 The ‘vegdist’ function of ‘vegan’ was used to create a Euclidean distance matrix of  
404 samples based on log<sub>2</sub>-transformed, centered, and scaled plant morphometric data. The ‘UniFrac’  
405 function of ‘phyloseq’ created weighted UNIFRAC distance matrices (90) from count tables and  
406 the phylogenetic tree. To test for the significance of sample clustering, the ‘adonis2’ function of  
407 ‘vegan’ was used with 1000 permutations (91). Two- and three-way tests were performed  
408 multiple times with the order of the independent variables in the formula changed to ensure  
409 consistency of test results, regardless of term precedence. To visualize sample distance  
410 relationships, Principal Coordinates Analyses (PCoAs) (92) were performed using the ‘pcoa’  
411 command of ‘ape’ (v 5.3) (93). In figures, percentages on axes labels of PCoA plots report the  
412 percent variation captured by each coordinate, and axes lengths are scaled to this number.  
413 Spearman’s rank correlations ( $\rho$ ) between distance matrices of plant trait and ASV count data  
414 were determined using the ‘bioenv’ and ‘mantel’ functions of ‘vegan’.

415 Significant effects of treatment and/or time on response variables were assessed with

## Seagrass Rhizobiome Community Dynamics

416 Student's T-tests and Analyses of Covariance (ANCOVAs) using the 't.test' and 'ancova'  
417 functions of 'stats' (v 3.5.2) and 'HH' (v 3.1-37) (94). If no significant interactions between the  
418 treatment effect and the time covariate were detected, an Analysis of Variance (ANOVA) was  
419 performed on a reduced model without the interaction term using the 'Anova' function of the  
420 'car' package and applying Type II sum of squares calculations (95).

421 Significant differences in ASV abundances between plant compartments ( $\alpha \leq .01$ ) were  
422 tested using the 'DESeq' function of 'DESeq2' (v 1.22.2) (96). Generalized linear mixed models  
423 (GLMMs) (97) were used to determine significantly different temporal trends in abundance for  
424 microbial taxa. A Tweedie compound Poisson distribution was chosen for this model given that  
425 it best captures the nature of amplicon sequence datasets (e.g., overdispersion, zero-inflated  
426 datasets, and continuous values) (98). The 'cpglmm' function of the 'cplm' R package (99) was  
427 used for time-series analyses following the general procedure outlined in (98). Summarized  
428 sequence count tables of family-level taxonomic units were created and full GLMMs were fit  
429 relating counts to treatment, days post transplantation, the interaction of main effects, and  
430 random effects of each taxon. Taxa detected in > 25% of samples and with cumulative sequence  
431 counts > 100 reads were tested to focus on the most abundant, prevalent, statistically robust  
432 groups in our samples. *P*-values of modeled slopes and intercepts were obtained via likelihood  
433 ratio tests between the full model and two reduced models where the interaction or the treatment  
434 variable was removed. Slope and intercept *p*-values were adjusted using the Benjamini-Hochberg  
435 method (100), and adjusted values  $\leq .05$  were considered significant. Resulting intercepts with  
436 positive values indicated that a taxon's initial abundance was higher in washed versus sod  
437 transplant rhizospheres, with negative intercepts implying the opposite. Modeled slopes with  
438 positive coefficients indicated that rate of increase for a given taxon's abundance was greater

## Seagrass Rhizobiome Community Dynamics

439 over the course of the experiment in the wash treatment than in sod samples, and vice versa for  
440 negative slope coefficients.

### 441 *Data Availability*

442 The sequence reads from all samples collected from experiments were deposited in the  
443 NCBI data bank (BioProject ID: PRJNA591021). Data access for reviewers only is available at:  
444 <https://dataview.ncbi.nlm.nih.gov/object/PRJNA591021?reviewer=o44608tibs1lcm4ngr8q8s4f8>  
445 [d](#)

### 446 *Acknowledgements*

447 We acknowledge Oregon State University's Summer Undergraduate Research  
448 Experience program, HMSC's Mamie Markham Research Award, and the Joan Countryman Suit  
449 Scholarship for financial support, the CGRB core facility for sequencing support, C. Moffett and  
450 I. Cheung at HMSC for facility and administrative support, E. Slick for help with sample  
451 collection.

452

453 **References**

- 454 1. Hiltner L. 1904. Über nevere Erfahrungen und Probleme auf dem Gebiet der Boden  
455 Bakteriologie und unter besonderer Beurchsichtigung der Gründüngung und Broche. Arb  
456 Deut Landw Ges Berl 98:59–78.
- 457 2. Bandyopadhyay P, Bhuyan SK, Yadava PK, Varma A, Tuteja N. 2017. Emergence of  
458 plant and rhizospheric microbiota as stable interactomes. *Protoplasma* 254:617–626.
- 459 3. Brodersen KE, Koren K, Mosshammer M, Ralph PJ, Kuhl M, Santner J. 2017. Seagrass-  
460 Mediated Phosphorus and Iron Solubilization in Tropical Sediments. *Environ Sci Technol*  
461 51:14155–14163.
- 462 4. Welsh DT. 2000. Nitrogen fixation in seagrass meadows: Regulation, plant–bacteria  
463 interactions and significance to primary productivity. *Ecol Lett* 3:58–71.
- 464 5. Welsh D, Wellsbury P, Bourgues S, deWit R, Herbert R. 1996. Relationship between  
465 porewater organic carbon content, sulphate reduction and nitrogen fixation (acetylene  
466 reduction) in the rhizosphere of *Zostera noltii*. *Hydrobiologia* 329:175–183.
- 467 6. Bais HP, Fall R, Vivanco JM. 2004. Biocontrol of *Bacillus subtilis* against Infection of  
468 *Arabidopsis* Roots by *Pseudomonas syringae* Is Facilitated by Biofilm Formation and  
469 Surfactin Production. *Plant Physiol* 134:307–319.
- 470 7. Morgan JAW, Bending GD, White PJ. 2005. Biological costs and benefits to plant–  
471 microbe interactions in the rhizosphere. *J Exp Bot* 56:1729–1739.
- 472 8. Yang J, Kloepper JW, Ryu C-M. 2009. Rhizosphere bacteria help plants tolerate abiotic  
473 stress. *Trends Plant Sci* 14:1–4.
- 474 9. Lebeis SL, Paredes SH, Lundberg DS, Breakfield N, Gehring J, McDonald M, Malfatti S,  
475 Rio TG del, Jones CD, Tringe SG, Dangl JL. 2015. Salicylic acid modulates colonization

## Seagrass Rhizobiome Community Dynamics

- 476 of the root microbiome by specific bacterial taxa. *Science* 349:860–864.
- 477 10. Bais HP, Weir TL, Perry LG, Gilroy S, Vivanco JM. 2006. The Role of Root Exudates in  
478 Rhizosphere Interactions with Plants and Other Organisms. *Annu Rev Plant Biol* 57:233–  
479 266.
- 480 11. Tkacz A, Cheema J, Chandra G, Grant A, Poole PS. 2015. Stability and succession of the  
481 rhizosphere microbiota depends upon plant type and soil composition. *ISME J* 9:2349–  
482 2359.
- 483 12. Chaparro JM, Badri DV, Vivanco JM. 2014. Rhizosphere microbiome assemblage is  
484 affected by plant development. *ISME J* 8:790–803.
- 485 13. Carvalhais LC, Dennis PG, Fan B, Fedoseyenko D, Kierul K, Becker A, Wiren N von,  
486 Borriss R. 2013. Linking Plant Nutritional Status to Plant-Microbe Interactions. *PLOS*  
487 *ONE* 8:e68555.
- 488 14. Lareen A, Burton F, Schäfer P. 2016. Plant root-microbe communication in shaping root  
489 microbiomes. *Plant Mol Biol* 90:575–587.
- 490 15. Cúcio C, Engelen AH, Costa R, Muyzer G. 2016. Rhizosphere Microbiomes of European  
491 Seagrasses Are Selected by the Plant, But Are Not Species Specific. *Front Microbiol* 7.
- 492 16. Garcias-Bonet N, Arrieta JM, Duarte CM, Marbà N. 2016. Nitrogen-fixing bacteria in  
493 Mediterranean seagrass (*Posidonia oceanica*) roots. *Aquat Bot* 131:57–60.
- 494 17. Orth RJ, Carruthers TJB, Dennison WC, Duarte CM, Fourqurean JW, Heck KL, Hughes  
495 AR, Kendrick GA, Kenworthy WJ, Olyarnik S, Short FT, Waycott M, Williams SL. 2006.  
496 A Global Crisis for Seagrass Ecosystems. *BioScience* 56:987–996.
- 497 18. Crump BC, Wojahn JM, Tomas F, Mueller RS. 2018. Metatranscriptomics and Amplicon  
498 Sequencing Reveal Mutualisms in Seagrass Microbiomes. *Front Microbiol* 9.

## Seagrass Rhizobiome Community Dynamics

- 499 19. Fahimipour AK, Kardish MR, Lang JM, Green JL, Eisen JA, Stachowicz JJ. 2017. Global-  
500 Scale Structure of the Eelgrass Microbiome. *Appl Environ Microbiol* 83:e03391-16.
- 501 20. Tarquinio F, Hyndes GA, Laverock B, Koenders A, Sävström C. 2019. The seagrass  
502 holobiont: understanding seagrass-bacteria interactions and their role in seagrass  
503 ecosystem functioning. *FEMS Microbiol Lett* 366.
- 504 21. Lehnen N, Marchant HK, Schwedt A, Milucka J, Lott C, Weber M, Dekaezemacker J,  
505 Seah BKB, Hach PF, Mohr W, Kuypers MMM. 2016. High rates of microbial dinitrogen  
506 fixation and sulfate reduction associated with the Mediterranean seagrass *Posidonia*  
507 *oceanica*. *Syst Appl Microbiol* 39:476–483.
- 508 22. Borum J, Pedersen O, Greve TM, Frankovich TA, Zieman JC, Fourqurean JW, Madden  
509 CJ. 2005. The potential role of plant oxygen and sulphide dynamics in die-off events of  
510 the tropical seagrass, *Thalassia testudinum*. *J Ecol* 93:148–158.
- 511 23. Holmer M, Bondgaard E. 2001. Photosynthetic and growth response of eelgrass to low  
512 oxygen and high sulfide concentrations during hypoxic events. *Aquat Bot* 70:29–38.
- 513 24. Martin BC, Bougoure J, Ryan MH, Bennett WW, Colmer TD, Joyce NK, Olsen YS,  
514 Kendrick GA. 2019. Oxygen loss from seagrass roots coincides with colonisation of  
515 sulphide-oxidising cable bacteria and reduces sulphide stress. *ISME J* 13:707.
- 516 25. Donnelly A, Herbert R. 1999. Bacterial interactions in the rhizosphere of seagrass  
517 communities in shallow coastal lagoons. *J Appl Microbiol* 85:151S-160S.
- 518 26. Kaldy JE, Eldridge PM, Cifuentes LA, Jones WB. 2006. Utilization of DOC from seagrass  
519 rhizomes by sediment bacteria: C-13-tracer experiments and modeling. *Mar Ecol Prog Ser*  
520 317:41–55.
- 521 27. Brodersen KE, Nielsen DA, Ralph PJ, Kuhl M. 2015. Oxic microshield and local pH



## Seagrass Rhizobiome Community Dynamics

- 522 enhancement protects *Zostera muelleri* from sediment derived hydrogen sulphide. New  
523 Phytol 205:1264–1276.
- 524 28. Milbrandt EC, Greenawalt-Boswell J, Sokoloff PD. 2008. Short-term indicators of  
525 seagrass transplant stress in response to sediment bacterial community disruption. Bot Mar  
526 51:103–111.
- 527 29. Cunha AH, Marbá NN, van Katwijk MM, Pickerell C, Henriques M, Bernard G, Ferreira  
528 MA, Garcia S, Garmendia JM, Manent P. 2012. Changing Paradigms in Seagrass  
529 Restoration. Restor Ecol 20:427–430.
- 530 30. van Katwijk MM, Thorhaug Anita, Marbà Núria, Orth Robert J., Duarte Carlos M.,  
531 Kendrick Gary A., Althuizen Inge H. J., Balestri Elena, Bernard Guillaume, Cambridge  
532 Marion L., Cunha Alexandra, Durance Cynthia, Giesen Wim, Han Qiuying, Hosokawa  
533 Shinya, Kiswara Wawan, Komatsu Teruhisa, Lardicci Claudio, Lee Kun-Seop, Meinesz  
534 Alexandre, Nakaoka Masahiro, O'Brien Katherine R., Paling Erik I., Pickerell Chris,  
535 Ransijn Aryan M. A., Verduin Jennifer J., Österblom Henrik. 2016. Global analysis of  
536 seagrass restoration: the importance of large-scale planting. J Appl Ecol 53:567–578.
- 537 31. van Katwijk MM, Bos AR, de Jonge VN, Hanssen LSAM, Hermus DCR, de Jong DJ.  
538 2009. Guidelines for seagrass restoration: Importance of habitat selection and donor  
539 population, spreading of risks, and ecosystem engineering effects. Mar Pollut Bull  
540 58:179–188.
- 541 32. Matheson FE, Reed J, Santos VMD, Mackay G, Cummings VJ. 2017. Seagrass  
542 rehabilitation: successful transplants and evaluation of methods at different spatial scales.  
543 N Z J Mar Freshw Res 51:96–109.
- 544 33. Cochetière MFDL, Durand T, Lepage P, Bourreille A, Galmiche JP, Doré J. 2005.

## Seagrass Rhizobiome Community Dynamics

- 545 Resilience of the Dominant Human Fecal Microbiota upon Short-Course Antibiotic  
546 Challenge. *J Clin Microbiol* 43:5588–5592.
- 547 34. Longford SR, Campbell AH, Nielsen S, Case RJ, Kjelleberg S, Steinberg PD. 2019.  
548 Interactions within the microbiome alter microbial interactions with host chemical  
549 defences and affect disease in a marine holobiont. *Sci Rep* 9:1–13.
- 550 35. Ritchie K. 2006. Regulation of microbial populations by coral surface mucus and mucus-  
551 associated bacteria. *Mar Ecol Prog Ser* 322:1–14.
- 552 36. Ettinger CL, Voerman SE, Lang JM, Stachowicz JJ, Eisen JA. 2017. Microbial  
553 communities in sediment from *Zostera marina* patches, but not the *Z. marina* leaf or root  
554 microbiomes, vary in relation to distance from patch edge. *PeerJ* 5:e3246.
- 555 37. Jensen H, McGlathery K, Marino R, Howarth R. 1998. Forms and availability of sediment  
556 phosphorus in carbonate sand of Bermuda seagrass beds. *Limnol Oceanogr* 43:799–810.
- 557 38. Mejia AY, Rotini A, Lacasella F, Bookman R, Thaller MC, Shem-Tov R, Winters G,  
558 Migliore L. 2016. Assessing the ecological status of seagrasses using morphology,  
559 biochemical descriptors and microbial community analyses. A study in *Halophila*  
560 *stipulacea* (Forsk.) Aschers meadows in the northern Red Sea. *Ecol Indic* 60:1150–1163.
- 561 39. Ugarelli K, Laas P, Stingl U. 2019. The Microbial Communities of Leaves and Roots  
562 Associated with Turtle Grass (*Thalassia testudinum*) and Manatee Grass (*Syringodium*  
563 *filliforme*) are Distinct from Seawater and Sediment Communities, but Are Similar  
564 between Species and Sampling Sites. *Microorganisms* 7.
- 565 40. Brodersen KE, Siboni N, Nielsen DA, Pernice M, Ralph PJ, Seymour J, Kühl M. 2018.  
566 Seagrass rhizosphere microenvironment alters plant-associated microbial community  
567 composition. *Environ Microbiol* 20:2854–2864.

## Seagrass Rhizobiome Community Dynamics

- 568 41. Lakshmanan V, Castaneda R, Rudrappa T, Bais HP. 2013. Root transcriptome analysis of  
569 *Arabidopsis thaliana* exposed to beneficial *Bacillus subtilis* FB17 rhizobacteria revealed  
570 genes for bacterial recruitment and plant defense independent of malate efflux. *Planta*  
571 238:657–668.
- 572 42. Wei Z, Yang T, Friman V-P, Xu Y, Shen Q, Jousset A. 2015. Trophic network  
573 architecture of root-associated bacterial communities determines pathogen invasion and  
574 plant health. *Nat Commun* 6:1–9.
- 575 43. Martin BC, Gleeson D, Statton J, Siebers AR, Grierson P, Ryan MH, Kendrick GA. 2018.  
576 Low Light Availability Alters Root Exudation and Reduces Putative Beneficial  
577 Microorganisms in Seagrass Roots. *Front Microbiol* 8.
- 578 44. Sävström C, Serrano O, Rozaimi M, Lavery PS. 2016. Utilization of carbon substrates by  
579 heterotrophic bacteria through vertical sediment profiles in coastal and estuarine seagrass  
580 meadows. *Environ Microbiol Rep* 8:582–589.
- 581 45. Maignien L, DeForce EA, Chafee ME, Eren AM, Simmons SL. 2014. Ecological  
582 Succession and Stochastic Variation in the Assembly of *Arabidopsis thaliana*  
583 Phyllosphere Communities. *mBio* 5:e00682-13.
- 584 46. Papazian S, Parrot D, Buryskova B, Weinberger F, Tasdemir D. 2019. Surface chemical  
585 defence of the eelgrass *Zostera marina* against microbial foulers. *Sci Rep* 9.
- 586 47. Edwards JL, Smith DL, Connolly J, McDonald JE, Cox MJ, Joint I, Edwards C, McCarthy  
587 AJ. 2010. Identification of Carbohydrate Metabolism Genes in the Metagenome of a  
588 Marine Biofilm Community Shown to Be Dominated by Gammaproteobacteria and  
589 Bacteroidetes. *Genes* 1:371–384.
- 590 48. Garcia R, La Clair JJ, Müller R. 2018. Future Directions of Marine Myxobacterial Natural

## Seagrass Rhizobiome Community Dynamics

- 591 Product Discovery Inferred from Metagenomics. *Mar Drugs* 16:303.
- 592 49. Mohr KI, Garcia RO, Gerth K, Irschik H, Müller R. 2012. *Sandaracinus amylolyticus* gen.  
593 nov., sp. nov., a starch-degrading soil myxobacterium, and description of Sandaracinaceae  
594 fam. nov. *Int J Syst Evol Microbiol* 62:1191–1198.
- 595 50. Thomas F, Hehemann J-H, Rebuffet E, Czjzek M, Michel G. 2011. Environmental and  
596 Gut Bacteroidetes: The Food Connection. *Front Microbiol* 2.
- 597 51. Kumar M, Kour D, Yadav AN, Saxena R, Rai PK, Jyoti A, Tomar RS. 2019. Biodiversity  
598 of methylotrophic microbial communities and their potential role in mitigation of abiotic  
599 stresses in plants. *Biologia (Bratisl)* 74:287–308.
- 600 52. Trotsenko YuA, Ivanova EG, Doronina NV. 2001. Aerobic Methylotrophic Bacteria as  
601 Phytosymbionts. *Microbiology* 70:623–632.
- 602 53. Boutard M, Cerisy T, Nogue P-Y, Alberti A, Weissenbach J, Salanoubat M, Tolonen AC.  
603 2014. Functional Diversity of Carbohydrate-Active Enzymes Enabling a Bacterium to  
604 Ferment Plant Biomass. *PLoS Genet* 10:e1004773.
- 605 54. Woo HL, Hazen TC. 2018. Enrichment of Bacteria From Eastern Mediterranean Sea  
606 Involved in Lignin Degradation via the Phenylacetyl-CoA Pathway. *Front Microbiol* 9.
- 607 55. Igai K, Itakura M, Nishijima S, Tsurumaru H, Suda W, Tsutaya T, Tomitsuka E, Tadokoro  
608 K, Baba J, Odani S, Natsuhara K, Morita A, Yoneda M, Greenhill AR, Horwood PF,  
609 Inoue J, Ohkuma M, Hongoh Y, Yamamoto T, Siba PM, Hattori M, Minamisawa K,  
610 Umezaki M. 2016. Nitrogen fixation and *nifH* diversity in human gut microbiota. *Sci Rep*  
611 6:1–11.
- 612 56. Cúcio C, Overmars L, Engelen AH, Muyzer G. 2018. Metagenomic Analysis Shows the  
613 Presence of Bacteria Related to Free-Living Forms of Sulfur-Oxidizing

## Seagrass Rhizobiome Community Dynamics

- 614 Chemolithoautotrophic Symbionts in the Rhizosphere of the Seagrass *Zostera marina*.  
615 Front Mar Sci 5.
- 616 57. Isaksen MF, Teske A. 1996. *Desulforhopalus vacuolatus* gen. nov., sp. nov., a new  
617 moderately psychrophilic sulfate-reducing bacterium with gas vacuoles isolated from a  
618 temperate estuary. Arch Microbiol 166:160–168.
- 619 58. Kessler AJ, Wawryk M, Marzocchi U, Roberts KL, Wong WW, Risgaard-Petersen N,  
620 Meysman FJR, Glud RN, Cook PLM. 2019. Cable bacteria promote DNRA through iron  
621 sulfide dissolution. Limnol Oceanogr 64:1228–1238.
- 622 59. Pfeiffer C, Larsen S, Song J, Dong M, Besenbacher F, Meyer RL, Kjeldsen KU, Schreiber  
623 L, Gorby YA, El-Naggar MY, Leung KM, Schramm A, Risgaard-Petersen N, Nielsen LP.  
624 2012. Filamentous bacteria transport electrons over centimetre distances. Nature 491:218–  
625 221.
- 626 60. Scholz VV, Mueller H, Koren K, Nielsen LP, Meckenstock RU. 2019. The rhizosphere of  
627 aquatic plants is a habitat for cable bacteria. FEMS Microbiol Ecol 95:fiz062.
- 628 61. Bourque AS, Vega-Thurber R, Fourqurean JW. 2015. Microbial community structure and  
629 dynamics in restored subtropical seagrass sediments. Aquat Microb Ecol 74:43–57.
- 630 62. Waite DW, Vanwonterghem I, Rinke C, Parks DH, Zhang Y, Takai K, Sievert SM, Simon  
631 J, Campbell BJ, Hanson TE, Woyke T, Klotz MG, Hugenholtz P. 2017. Comparative  
632 Genomic Analysis of the Class Epsilonproteobacteria and Proposed Reclassification to  
633 Epsilonbacteraeota (phyl. nov.). Front Microbiol 8.
- 634 63. Jensen SI, Kühl M, Priemé A. 2007. Different bacterial communities associated with the  
635 roots and bulk sediment of the seagrass *Zostera marina*. FEMS Microbiol Ecol 62:108–  
636 117.

## Seagrass Rhizobiome Community Dynamics

- 637 64. Probandt D, Knittel K, Tegetmeyer HE, Ahmerkamp S, Holtappels M, Amann R. 2017.  
638 Permeability shapes bacterial communities in sublittoral surface sediments. *Environ*  
639 *Microbiol* 19:1584–1599.
- 640 65. Rodriguez-Mora MJ, Edgcomb VP, Taylor C, Scranton MI, Taylor GT, Chistoserdov AY.  
641 2016. The Diversity of Sulfide Oxidation and Sulfate Reduction Genes Expressed by the  
642 Bacterial Communities of the Cariaco Basin, Venezuela. *Open Microbiol J* 10.
- 643 66. Lilburn TG, Gu J, Cai H, Wang Y. 2010. Comparative genomics of the family  
644 Vibrionaceae reveals the wide distribution of genes encoding virulence-associated  
645 proteins. *BMC Genomics* 11:369.
- 646 67. Mueller RS, McDougald D, Cusumano D, Sodhi N, Kjelleberg S, Azam F, Bartlett DH.  
647 2007. *Vibrio cholerae* Strains Possess Multiple Strategies for Abiotic and Biotic Surface  
648 Colonization. *J Bacteriol* 189:5348–5360.
- 649 68. Suykerbuyk W, Govers LL, Bouma TJ, Giesen WBJT, Jong DJ de, Voort R van de,  
650 Giesen K, Giesen PT, van Katwijk MM. 2016. Unpredictability in seagrass restoration:  
651 analysing the role of positive feedback and environmental stress on *Zostera noltii*  
652 transplants. *J Appl Ecol* 53:774–784.
- 653 69. Thom R, Gaeckle J, Buenau K, Borde A, Vavrinec J, Aston L, Woodruff D, Khangaonkar  
654 T, Kaldy J. 2018. Eelgrass (*Zostera marina* L.) restoration in Puget Sound: development  
655 of a site suitability assessment process: Puget Sound eelgrass restoration site selection.  
656 *Restor Ecol* 26:1066–1074.
- 657 70. Novak AB, Plaisted HK, Hays CG, Hughes RA. 2017. Limited effects of source  
658 population identity and number on seagrass transplant performance. *PeerJ* 5.
- 659 71. Davis RC, Short FT. 1997. Restoring eelgrass, *Zostera marina* L., habitat using a new

## Seagrass Rhizobiome Community Dynamics

- 660 transplanting technique: The horizontal rhizome method. *Aquat Bot* 59:1–15.
- 661 72. Zhou Y, Liu P, Liu B, Liu X, Zhang X, Wang F, Yang H. 2014. Restoring Eelgrass  
662 (*Zostera marina* L.) Habitats Using a Simple and Effective Transplanting Technique.  
663 PLoS ONE 9.
- 664 73. Lundberg DS, Lebeis SL, Paredes SH, Yourstone S, Gehring J, Malfatti S, Tremblay J,  
665 Engelbrekton A, Kunin V, Rio TG del, Edgar RC, Eickhorst T, Ley RE, Hugenholtz P,  
666 Tringe SG, Dangl JL. 2012. Defining the core *Arabidopsis thaliana* root microbiome.  
667 *Nature* 488:86–90.
- 668 74. Kaldy JE. 2012. Influence of light, temperature and salinity on dissolved organic carbon  
669 exudation rates in *Zostera marina* L. *Aquat Biosyst* 8:19.
- 670 75. Tomas F, Abbott JM, Steinberg C, Balk M, Williams SL, Stachowicz JJ. 2011. Plant  
671 genotype and nitrogen loading influence seagrass productivity, biochemistry, and plant-  
672 herbivore interactions. *Ecology* 92:1807–1817.
- 673 76. Crump BC, Kling GW, Bahr M, Hobbie JE. 2003. Bacterioplankton Community Shifts in  
674 an Arctic Lake Correlate with Seasonal Changes in Organic Matter Source. *Appl Environ*  
675 *Microbiol* 69:2253–2268.
- 676 77. Kieft B, Li Z, Bryson S, Crump BC, Hettich R, Pan C, Mayali X, Mueller RS. 2018.  
677 Microbial Community Structure–Function Relationships in Yaquina Bay Estuary Reveal  
678 Spatially Distinct Carbon and Nitrogen Cycling Capacities. *Front Microbiol* 9.
- 679 78. Callahan BJ, McMurdie PJ, Rosen MJ, Han AW, Johnson AJA, Holmes SP. 2016.  
680 DADA2: High-resolution sample inference from Illumina amplicon data. *Nat Methods*  
681 13:581–583.
- 682 79. Morgan M. 2018. BiocManager: Access the Bioconductor Project Package Repository.

## Seagrass Rhizobiome Community Dynamics

- 683 80. R Core Team. 2018. R: A Language and Environment for Statistical Computing. R  
684 Foundation for Statistical Computing, Vienna, Austria.
- 685 81. Quast C, Pruesse E, Yilmaz P, Gerken J, Schweer T, Yarza P, Peplies J, Glöckner FO.  
686 2013. The SILVA ribosomal RNA gene database project: improved data processing and  
687 web-based tools. *Nucleic Acids Res* 41:D590–D596.
- 688 82. Oksanen J, Blanchet FG, Friendly M, Kindt R, Legendre P, McGlenn D, Minchin PR,  
689 O’Hara RB, Simpson GL, Solymos P, Stevens MHH, Szoecs E, Wagner H. 2019. *vegan*:  
690 Community Ecology Package.
- 691 83. Schloss PD, Westcott SL, Ryabin T, Hall JR, Hartmann M, Hollister EB, Lesniewski RA,  
692 Oakley BB, Parks DH, Robinson CJ, Sahl JW, Stres B, Thallinger GG, Horn DJV, Weber  
693 CF. 2009. Introducing mothur: Open-Source, Platform-Independent, Community-  
694 Supported Software for Describing and Comparing Microbial Communities. *Appl Environ*  
695 *Microbiol* 75:7537–7541.
- 696 84. Price MN, Dehal PS, Arkin AP. 2010. FastTree 2 – Approximately Maximum-Likelihood  
697 Trees for Large Alignments. *PLoS ONE* 5:e9490.
- 698 85. Tavaré S. 1986. Some Probabilistic and Statistical Problems in the Analysis of DNA  
699 Sequences. *Lect Math Life Sci* 1:57–86.
- 700 86. Junier T, Zdobnov EM. 2010. The Newick utilities: high-throughput phylogenetic tree  
701 processing in the Unix shell. *Bioinformatics* 26:1669–1670.
- 702 87. McMurdie PJ, Holmes S. 2013. *phyloseq*: An R Package for Reproducible Interactive  
703 Analysis and Graphics of Microbiome Census Data. *PLoS ONE* 8:e61217.
- 704 88. Wickham H. 2016. *ggplot2: Elegant Graphics for Data Analysis*. Springer-Verlag New  
705 York.



## Seagrass Rhizobiome Community Dynamics

- 706 89. Kassambara A. 2019. ggpubr: “ggplot2” Based Publication Ready Plots.
- 707 90. Lozupone CA, Stombaugh JI, Gordon JI, Jansson JK, Knight R. 2012. Diversity, stability  
708 and resilience of the human gut microbiota. *Nature* 489:220–230.
- 709 91. Anderson MJ. 2001. A new method for non-parametric multivariate analysis of variance.  
710 *Austral Ecol* 26:32–46.
- 711 92. Borg I, Groenen PJF. 2005. *Modern Multidimensional Scaling: Theory and Applications*,  
712 2nd ed. Springer-Verlag, New York.
- 713 93. Paradis E, Schliep K. 2018. ape 5.0: an environment for modern phylogenetics and  
714 evolutionary analyses in R. *Bioinformatics* 35:526–528.
- 715 94. Heiberger RM. 2019. *HH: Statistical Analysis and Data Display: Heiberger and Holland*.
- 716 95. Fox J, Weisberg S. 2019. *An R Companion to Applied Regression Third*. Sage, Thousand  
717 Oaks CA.
- 718 96. Love MI, Huber W, Anders S. 2014. Moderated estimation of fold change and dispersion  
719 for RNA-seq data with DESeq2. *Genome Biol* 15:550.
- 720 97. Bolker BM, Brooks ME, Clark CJ, Geange SW, Poulsen JR, Stevens MHH, White J-SS.  
721 2009. *Generalized linear mixed models: a practical guide for ecology and evolution*.  
722 *Trends Ecol Evol* 24:127–135.
- 723 98. Sharpton T, Lyalina S, Luong J, Pham J, Deal EM, Armour C, Gaulke C, Sanjabi S,  
724 Pollard KS. 2017. Development of Inflammatory Bowel Disease Is Linked to a  
725 Longitudinal Restructuring of the Gut Metagenome in Mice. *mSystems* 2:e00036-17.
- 726 99. Zhang Y. 2013. Likelihood-based and Bayesian methods for Tweedie compound Poisson  
727 linear mixed models. *Stat Comput* 23:743–757.
- 728 100. Benjamini Y, Hochberg Y. 1995. Controlling the False Discovery Rate: A Practical and

## Seagrass Rhizobiome Community Dynamics

729 Powerful Approach to Multiple Testing. *J R Stat Soc Ser B Methodol* 57:289–300.

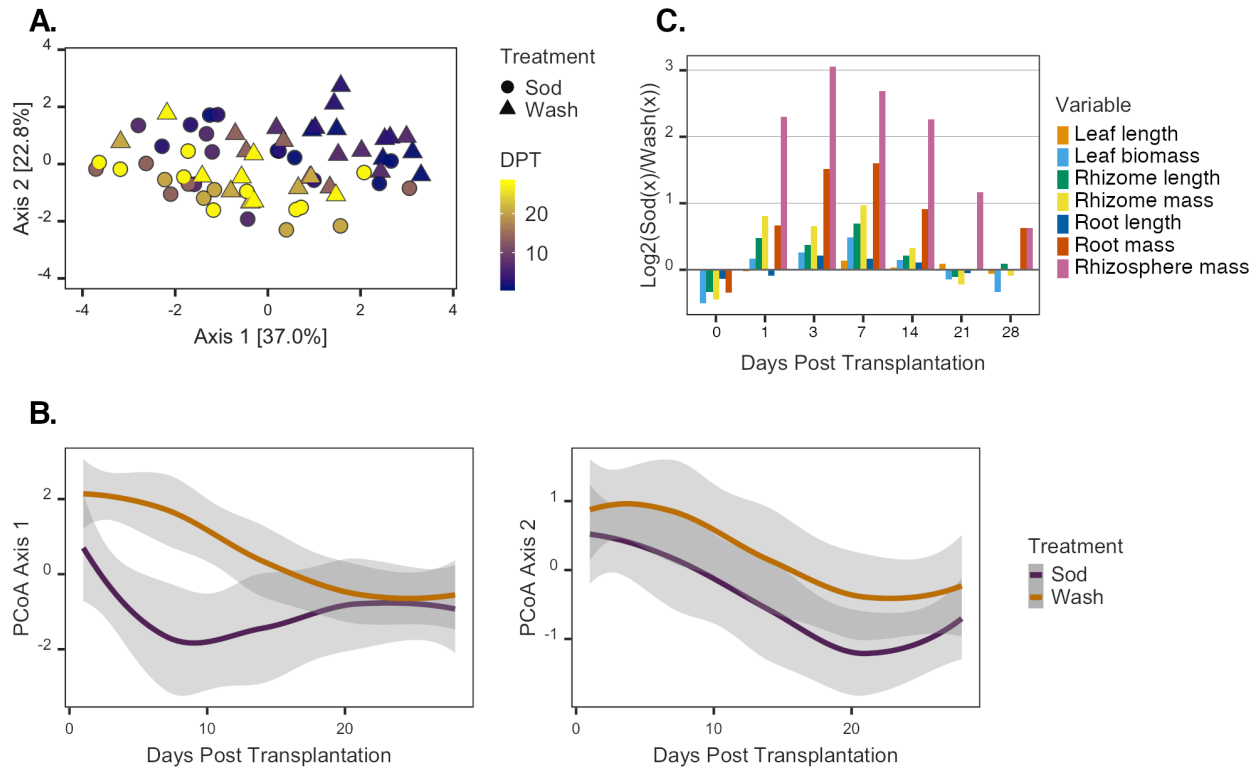

**Figure 1: Variance in *Z. marina* Traits Over Time.** (A) PCoA of *Z. marina* plants based on a Euclidean distance matrix relating plant traits. Color gradient represents the day of plant collection (DPT), and symbols represent the treatment assignment of each plant. (B) Loess smoothed estimates of the first two principal coordinate summary variables over time (cumulative variance = 59.8%). Shaded areas represent 95% confidence intervals of estimates, and colors designate each respective treatment (purple = sod transplants, gold = washed transplants). (C) Relative differences in log transformed values of *Z. marina* morphometric data at sampling points over time. Positive values indicate higher values in sod transplants than washed, and negative values indicate the opposite.

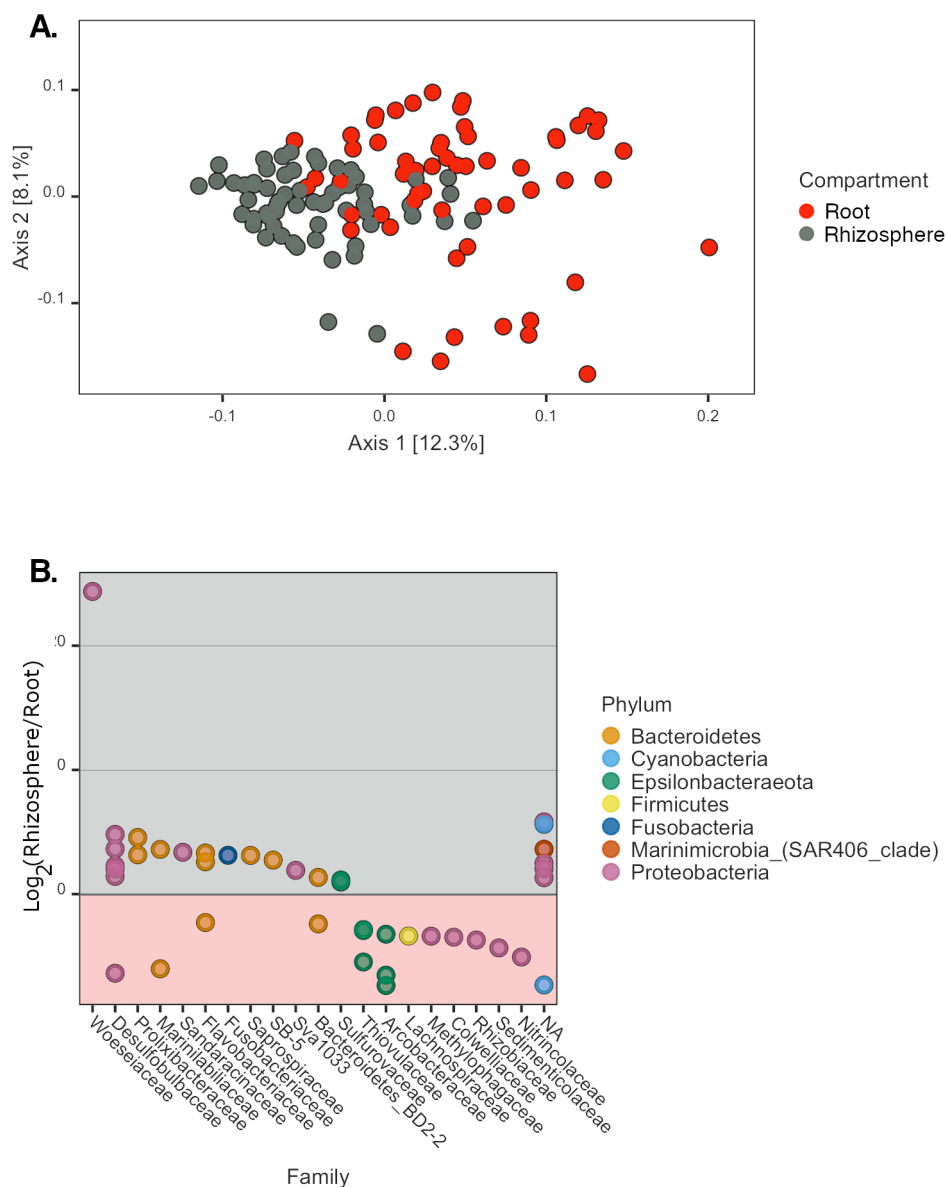

**Figure 2: Microbial Community Differences Between *Z. marina* Compartments.** (A) PCoA of *Z. marina* all sampled microbial communities based on a weighted UNIFRAC distance matrix. Colors indicate the compartment of each sample (Red = Root, Gray = Rhizosphere). (B) Taxa with significant relative abundance differences between compartments. Positive values indicate higher relative abundances of ASVs in rhizospheres than roots, and negative values indicate the opposite. ASVs assigned to the same phylum have the same color. ASVs are grouped by column by taxonomic family.

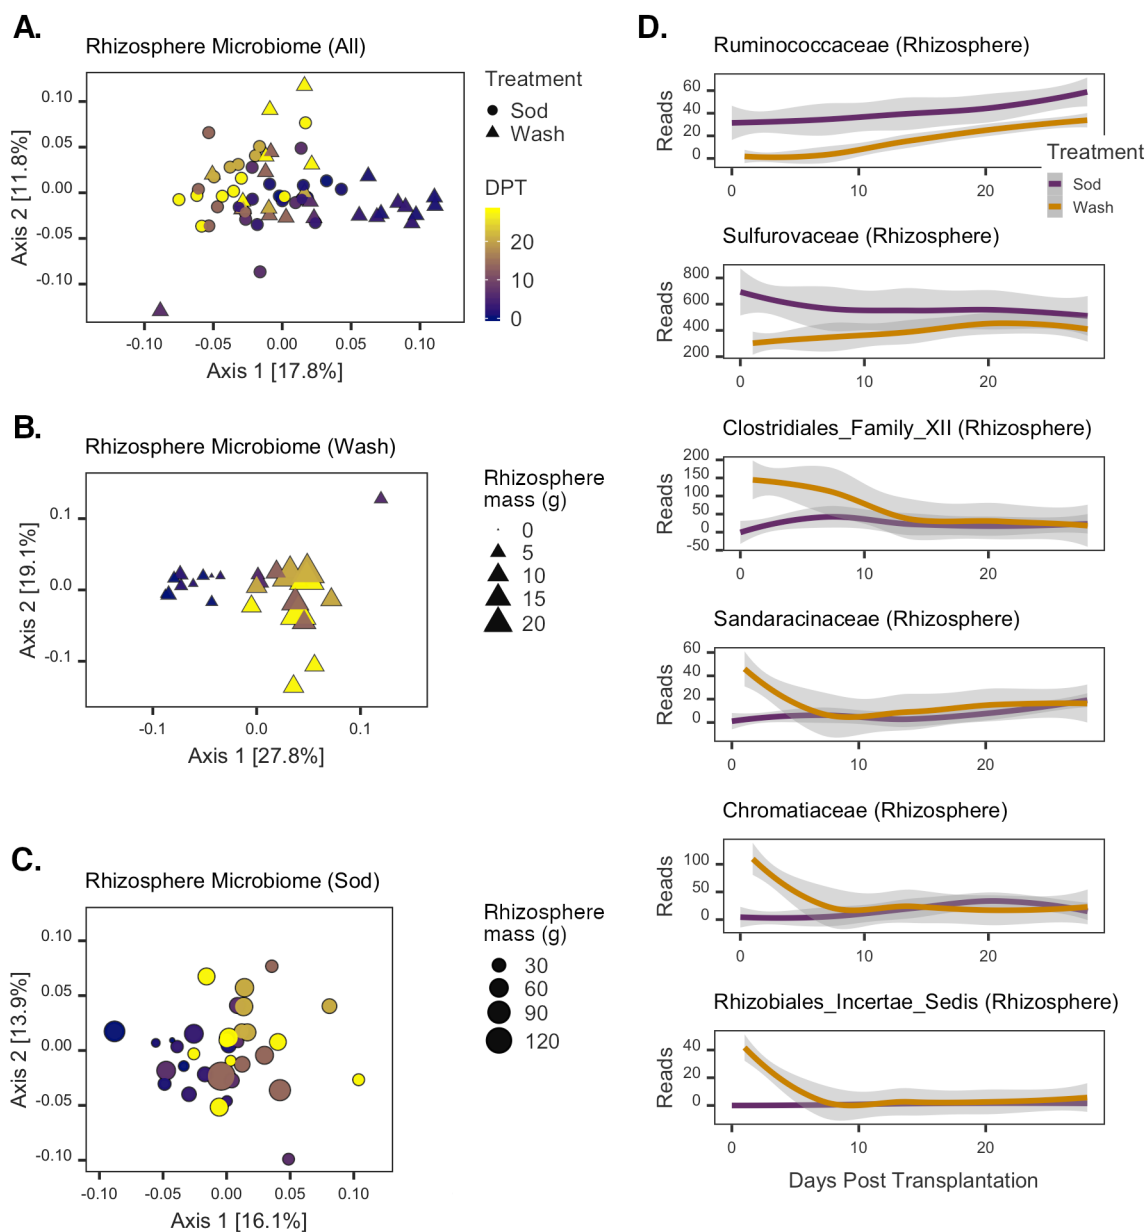

**Figure 3: Changes in Rhizosphere Microbial Communities Post transplantation.** PCoAs of (A) all rhizosphere, (B) washed rhizosphere, and (C) sod transplant rhizosphere communities. Color gradient represents the day of sample collection (DPT), and symbols represent the treatment assignment of each sample. Symbol size in (B) and (C) is scaled to the grams of rhizosphere sediment collected from each corresponding sampled plant. (D) Rhizosphere ASVs with significant Time x Treatment interaction effects. Lines are loess smoothed estimates of the sequence counts for each taxon; shaded areas represent 95% confidence intervals of estimates. Colors designate each respective treatment group (purple = sod transplants, gold = washed transplants).

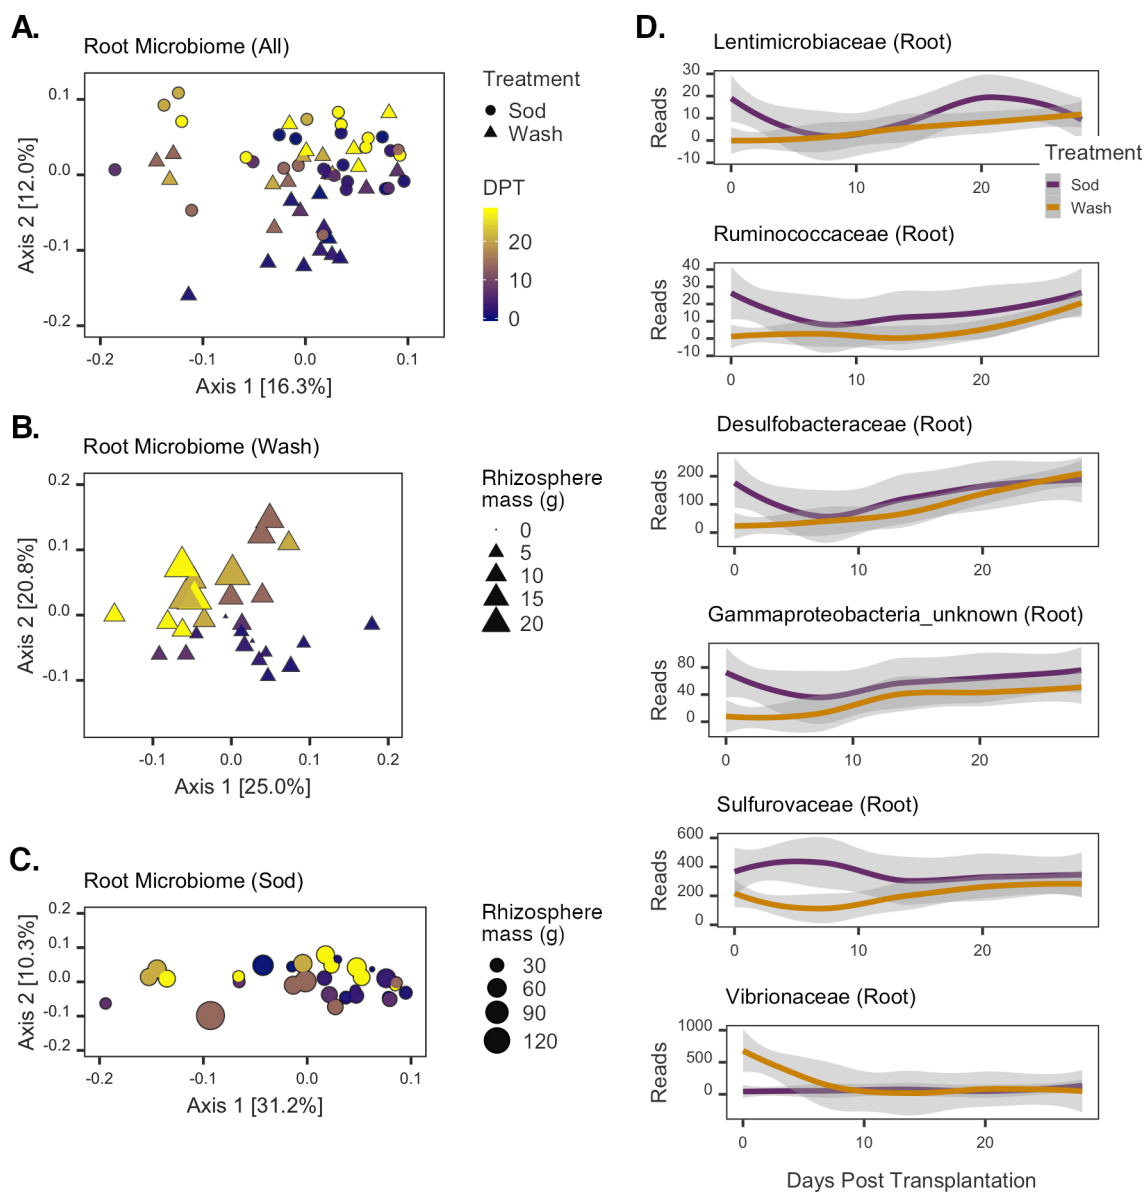

**Figure 4: Changes in Root Microbial Communities Post transplantation.** PCoAs of (A) all root, (B) washed root, and (C) sod transplant root communities. Color gradient represents the day of sample collection (DPT), and symbols represent the treatment assignment of each sample. Symbol size in (B) and (C) is scaled to the grams of rhizosphere sediment collected from each corresponding sampled plant. (D) Root ASVs with significant Time x Treatment interaction effects. Lines are loess smoothed estimates of the sequence counts for each taxon; shaded areas represent 95% confidence intervals of estimates. Colors designate each respective treatment group (purple = sod transplants, gold = washed transplants).
